# Supplementary material for: Synthesis, characterization, and sorption activity of novel azo-colorants derived from phloroglucinol and antipyrine and their metal complexes
Source: Royal Society of Chemistry journal article supplement (doi:10.1039/d1ra07254d), 2022-01-01
Supplement: d1ra07254d1.pdf [file d1ra07254d1.pdf]

## Synthesis, characterization, and sorption activity of novel azo-colorants derived from phloroglucinol and antipyrine and their metal complexes

\*<sup>a</sup> Anh Van Nguyen, <sup>b</sup> Anh Thi Ngoc Vu, <sup>c</sup> Liya V. Bazan, <sup>c</sup> Ravil T. Galeev, <sup>d</sup> Andrey N. Utenyshev, <sup>e</sup> Ekaterina B. Markova, <sup>e,f</sup> Olga V. Kovalchukova, <sup>g,h</sup> Van Thuan Le

<sup>a</sup> Faculty of Food Science and Technology, Ho Chi Minh City University of Food Industry, 140 Le Trong Tan Street, Tan Phu District, Ho Chi Minh City, 72000, Vietnam.

<sup>b</sup> Pharmaceutical Department of Buon Ma Thuot University, 298 Ha Huy Tap, Buon Ma Thuot, Daklak 630000, Vietnam

<sup>c</sup> E. K. Zavoisky Physical-Technical Institute, FRC Kazan Scientific Center of RAS, Kazan 420029, Russia

<sup>d</sup> Semenov Institute of Problems of Chemical Physics RAS, 1, Academician Semenov avenue, Chernogolovka, Moscow region, 142432, Russia

<sup>e</sup> Kosygin Russian State University (Technology, Design, Art), 33, Sadovnicheskaya street, Moscow, 117997, Russia

<sup>f</sup> Peoples' Friendship University of Russia (RUDN University), 6, Miklukho- Maklaya street, Moscow, 117198, Russia

<sup>g</sup> Center for Advanced Chemistry, Institute of Research and Development, Duy Tan University, 03 Quang Trung, Da Nang 55000, Vietnam

<sup>h</sup> The Faculty of Natural Science, Duy Tan University, 03 Quang Trung, Da Nang 55000, Vietnam

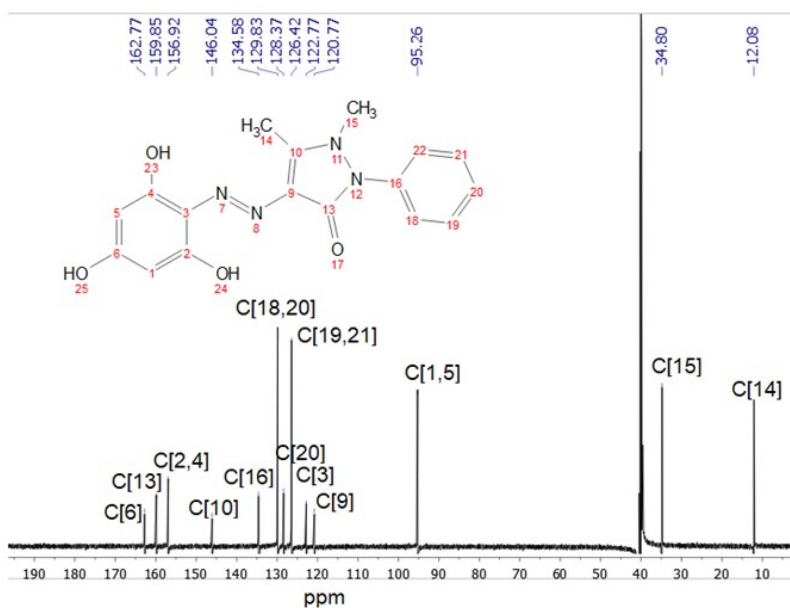

a)

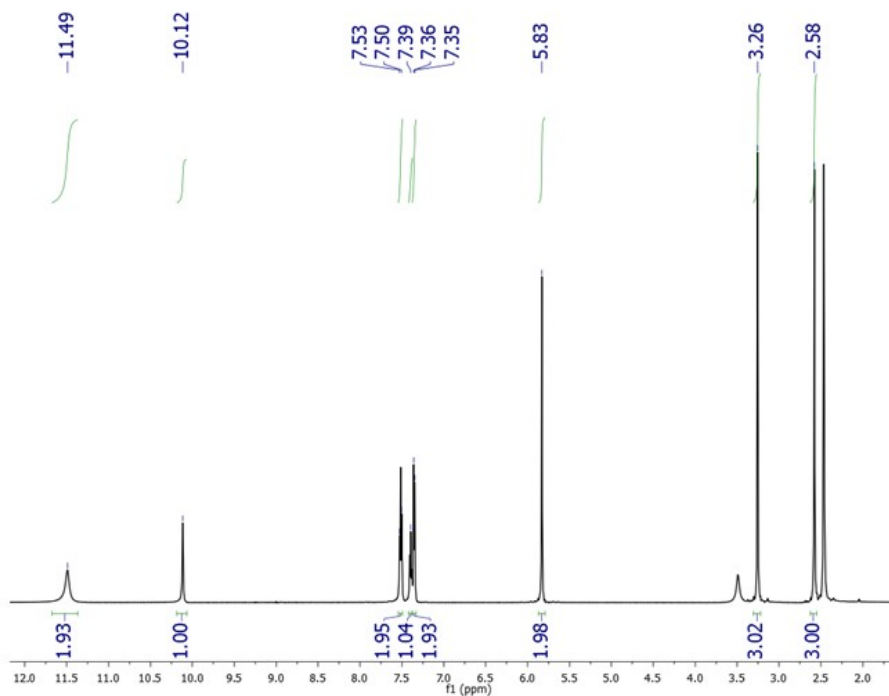

b)

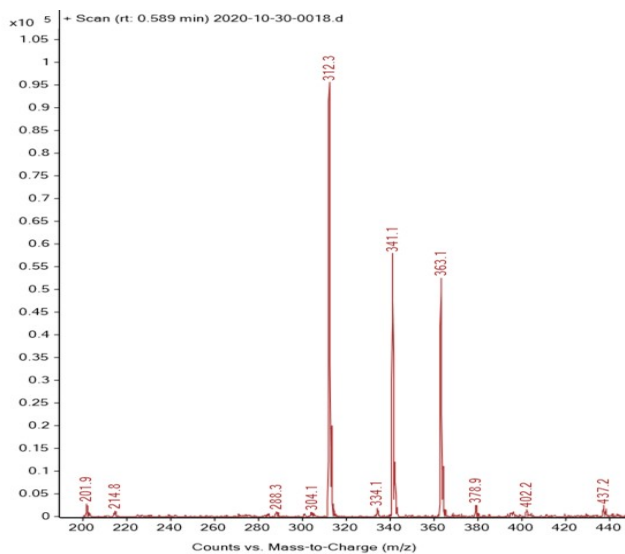

c)

Fig 1S.  $^1\text{H}$  (a) and  $^{13}\text{C}$  NMR (b) spectra and mass spectra (c) of  $\text{H}_3\text{L}^1$

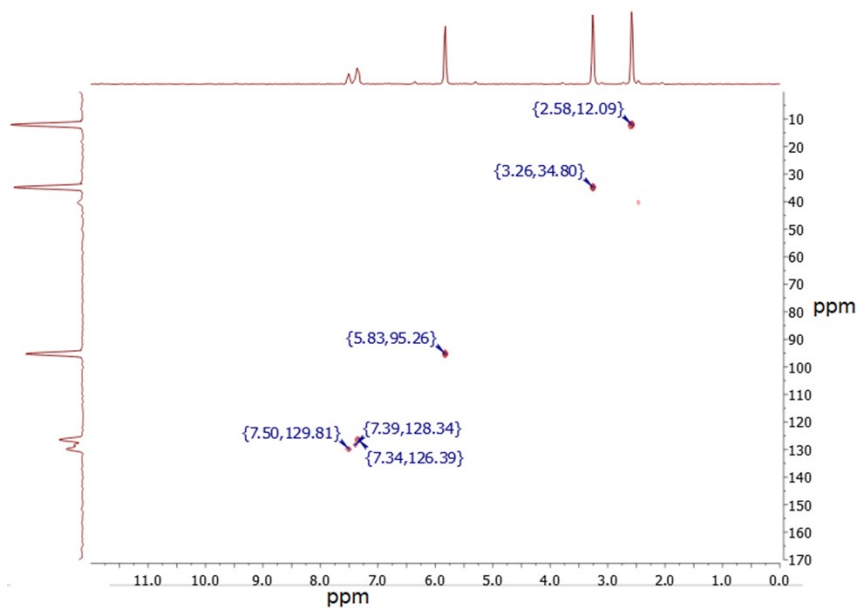

Fig 2S. COSY  $^1\text{H}$ - $^1\text{H}$  NMR spectra of  $\text{H}_3\text{L}^1$

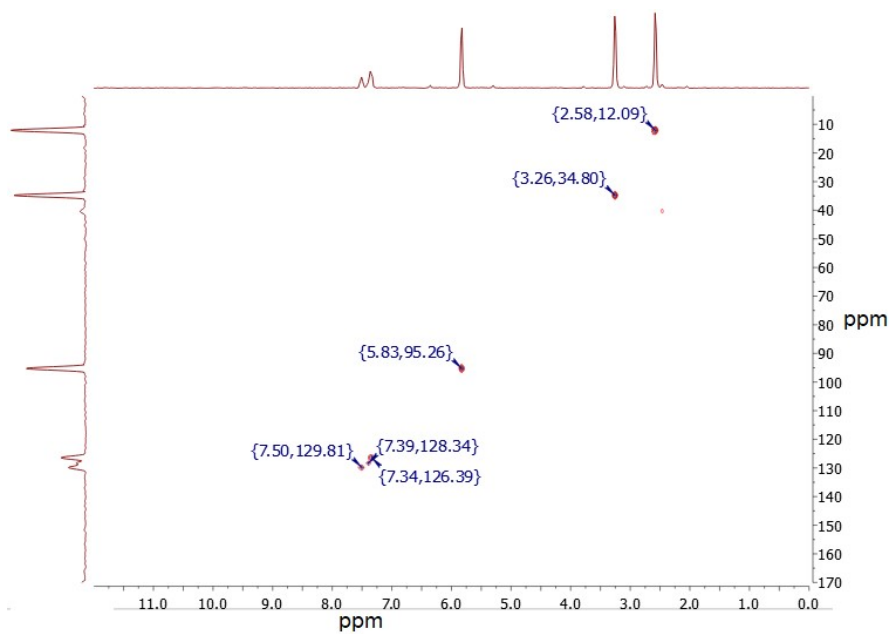

Fig 3S. HMBC  $^1\text{H}$ - $^{13}\text{C}$  NMR spectra of  $\text{H}_3\text{L}^1$

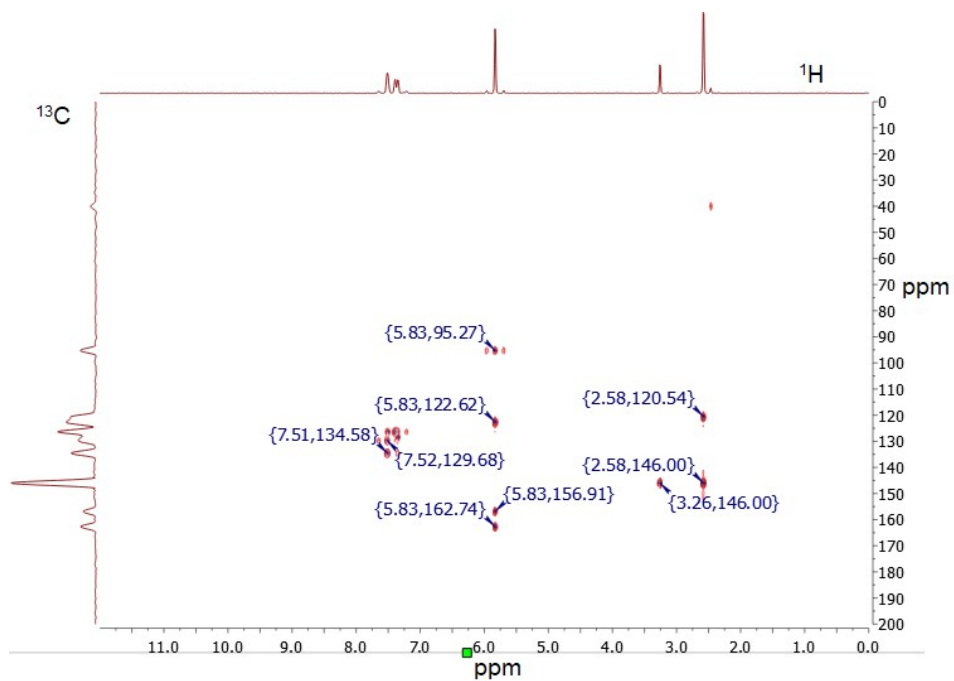

Fig 4S. HMQC  $^1\text{H}$ - $^{13}\text{C}$  NMR spectra of  $\text{H}_3\text{L}^1$

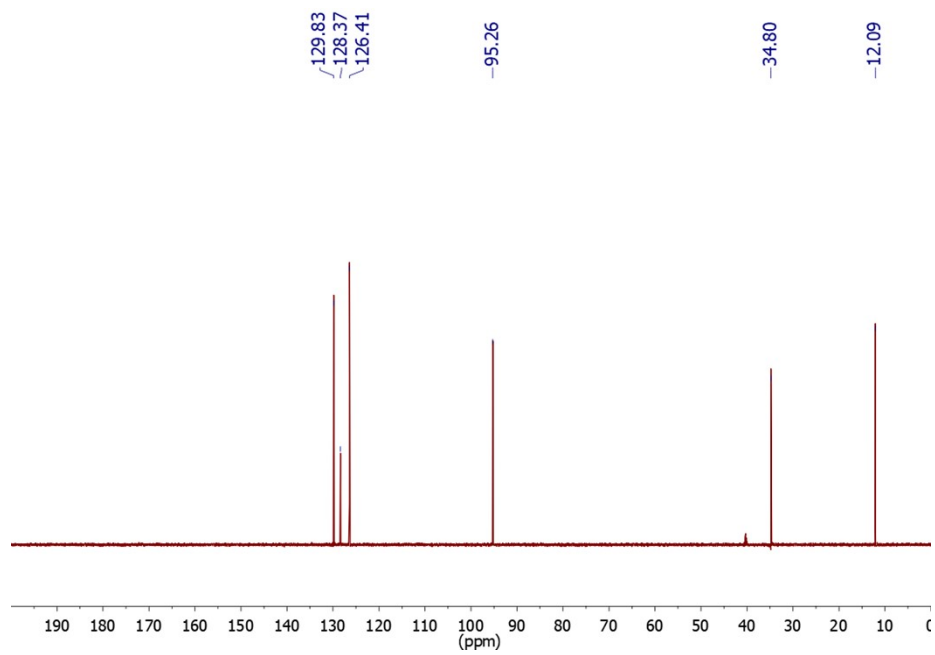

Fig. 5S. DEPT 135  $^{13}\text{C}$  NMR spectra of  $\text{H}_3\text{L}^1$

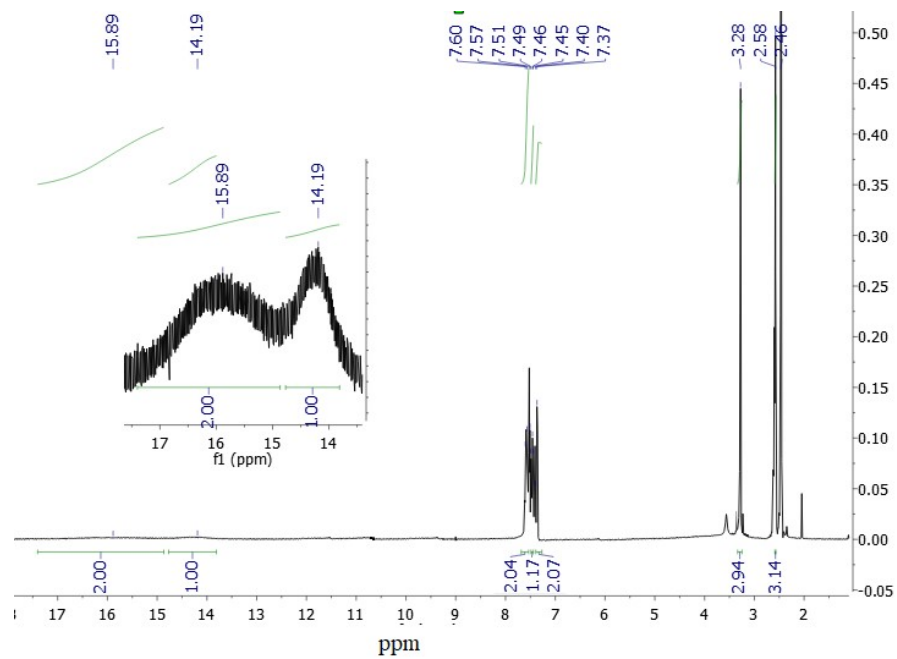

a

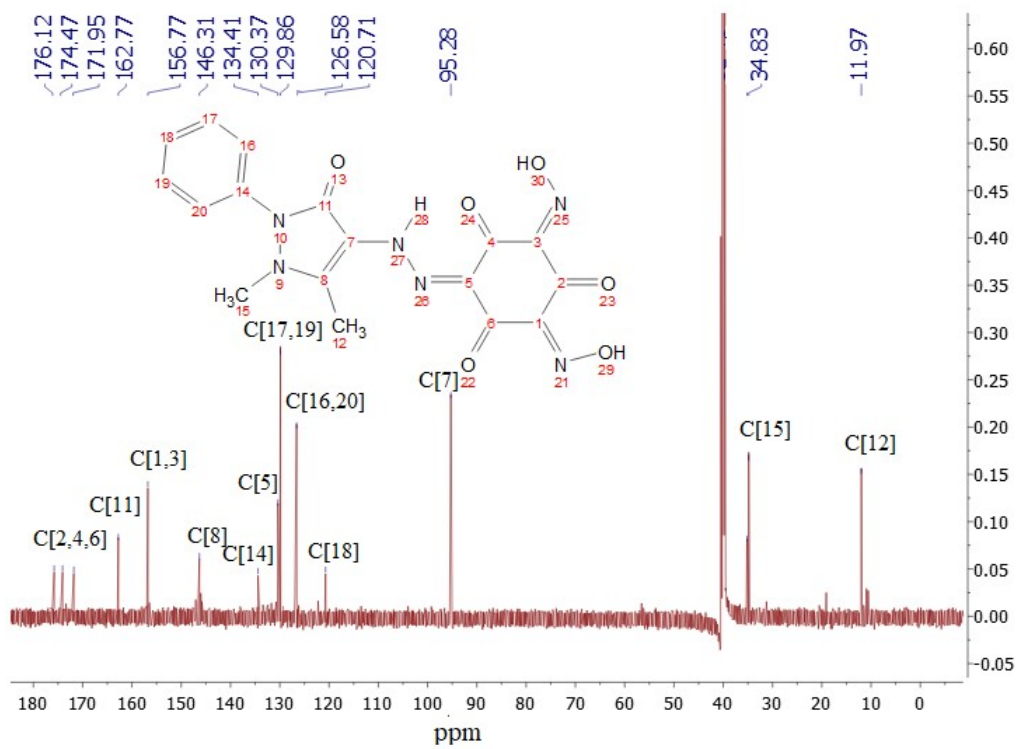

b

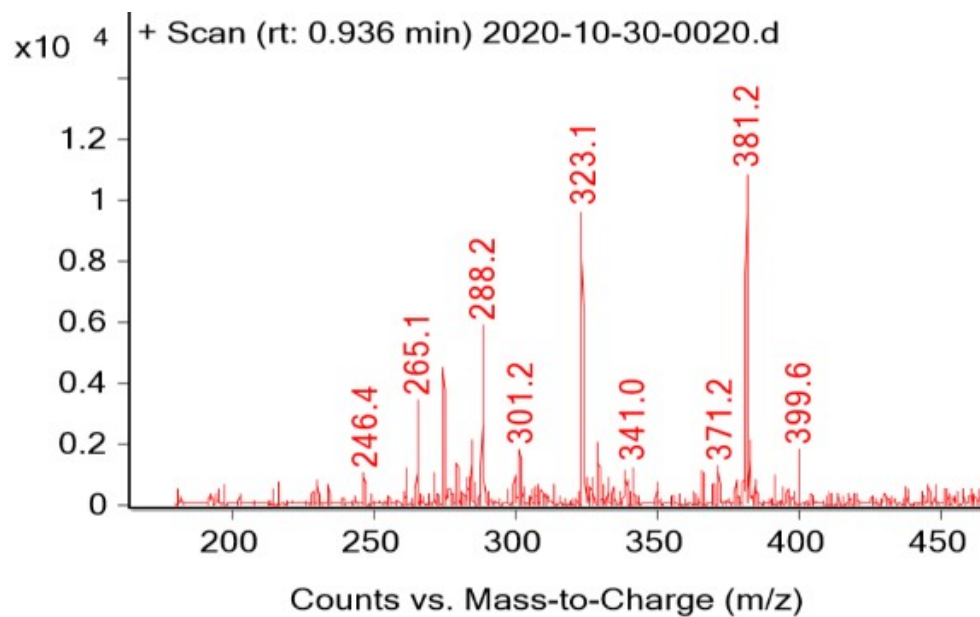

c

Fig 6S.  $^1\text{H}$  (a) and  $^{13}\text{C}$  (b) NMR spectra of  $\text{H}_3\text{L}^2$  and mass spectra (c)

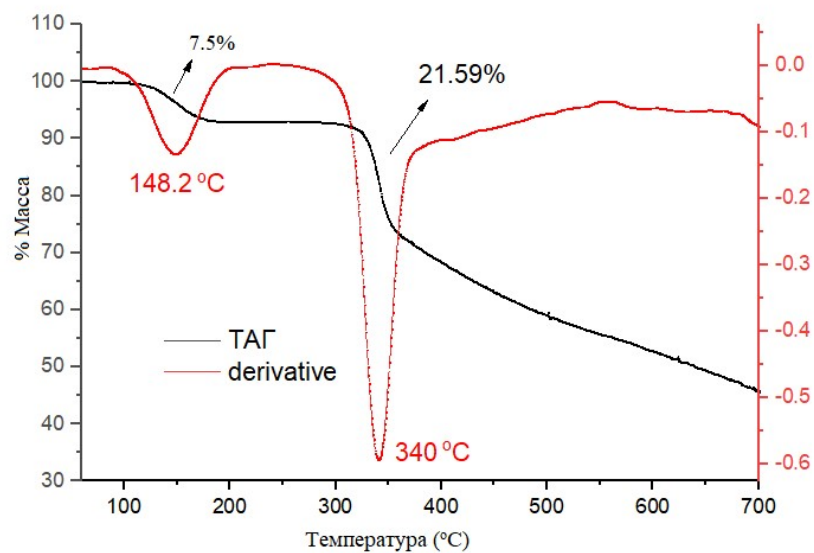

Fig 7S. Thermogravimetric analysis  $[\text{ZnH}_2\text{L}^1\text{Cl} \cdot 2\text{H}_2\text{O}]$  (4)

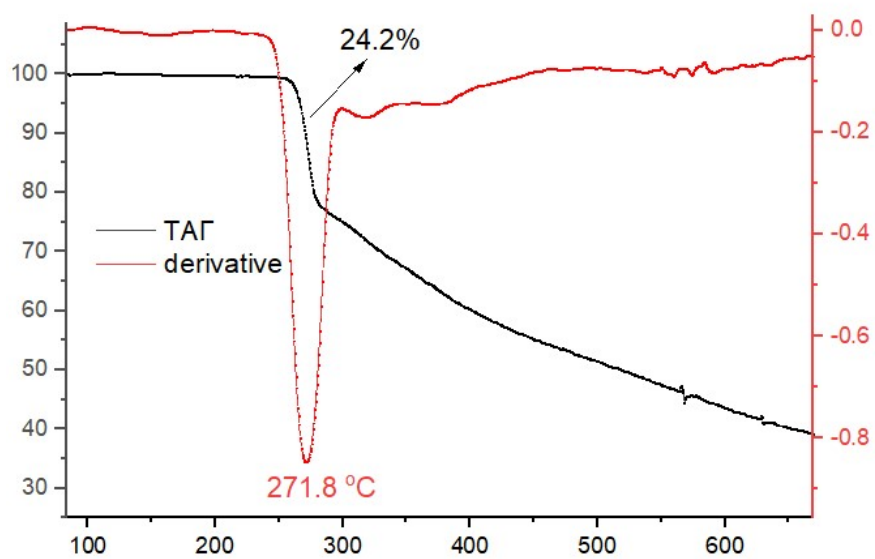

Fig 8S. Thermogravimetric analysis  $\text{Cd}_2\text{Cl}_4(\text{H}_3\text{L}^1)_2$  (5)

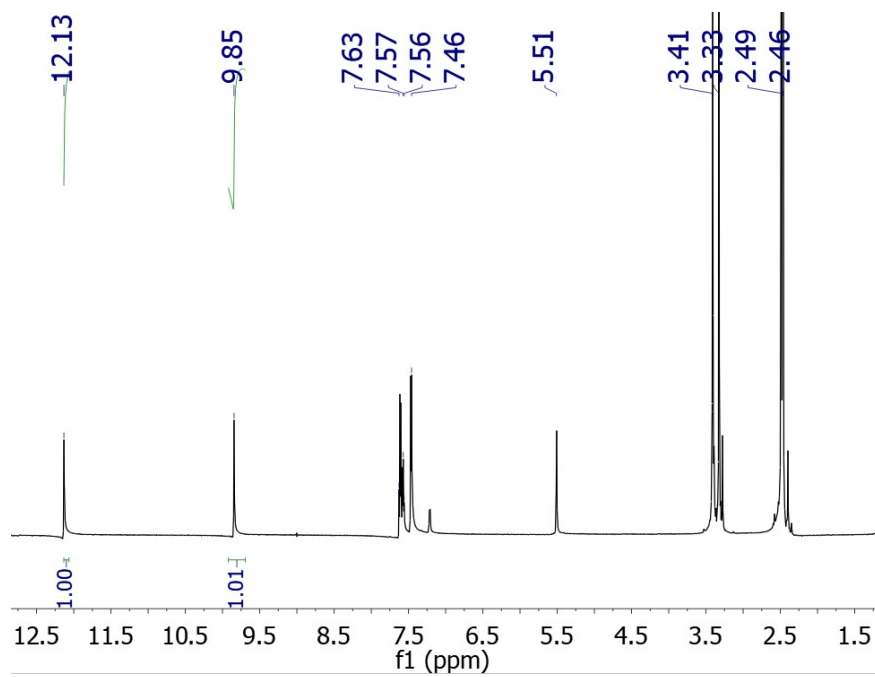

a

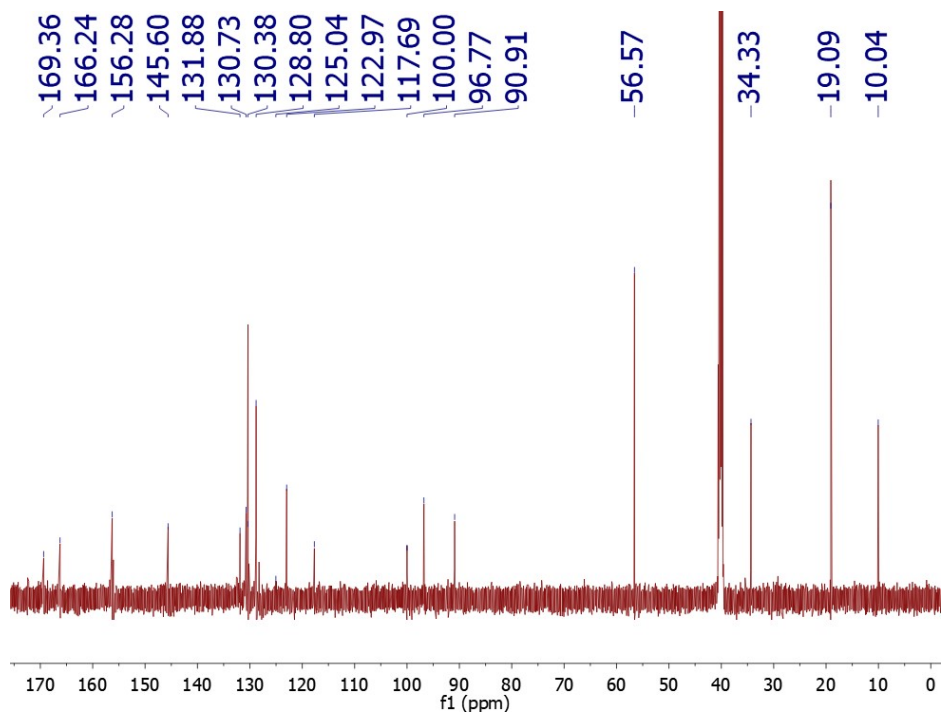

**b**

**Fig 9S.** <sup>1</sup>H (a) and <sup>13</sup>C (b) NMR spectra of ZnH<sub>2</sub>L<sup>1</sup>Cl·2H<sub>2</sub>O (4)

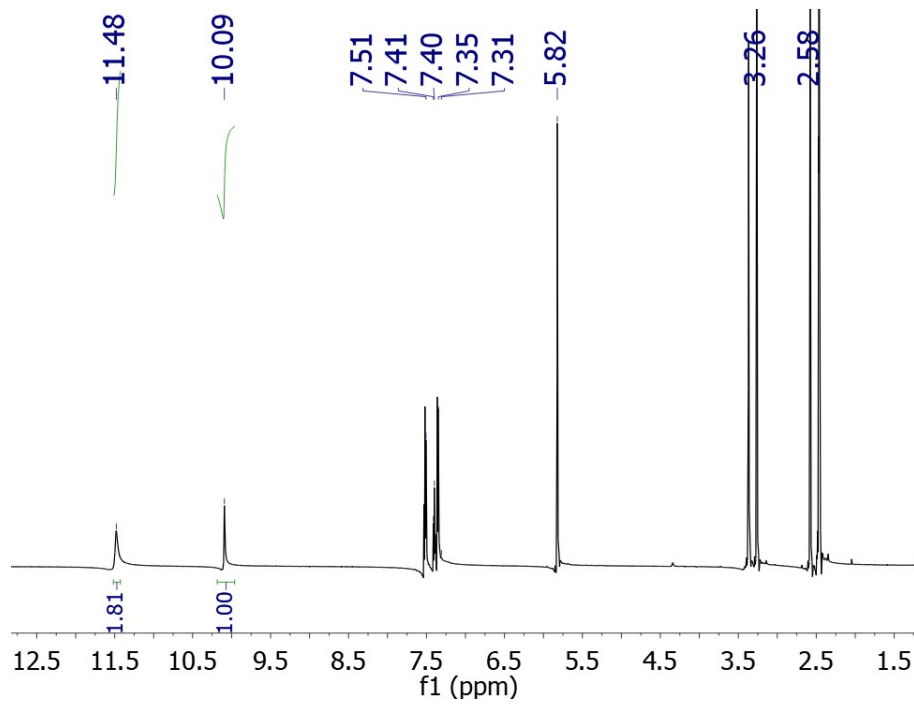

**a**



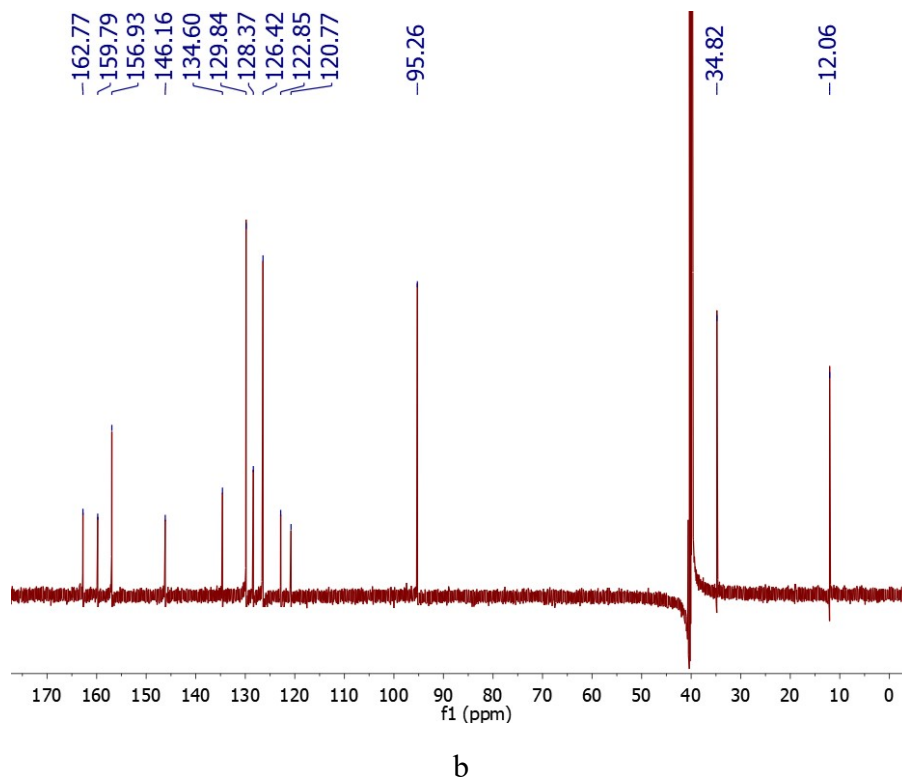

**Fig 10S.**  $^1\text{H}$  (a) and  $^{13}\text{C}$  (b) NMR spectra of  $\text{Cd}_2\text{Cl}_4(\text{H}_3\text{L}^1)_2$  (5)

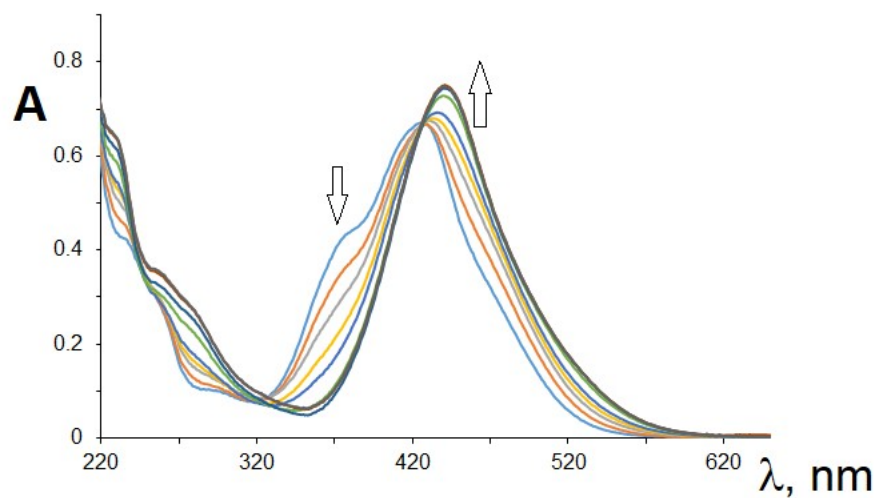

**Fig 11S.** Changes in electronic absorption spectra of ethanol solutions of  $\text{H}_3\text{L}^1$  at stepwise addition of the solution  $\text{CuCl}_2$

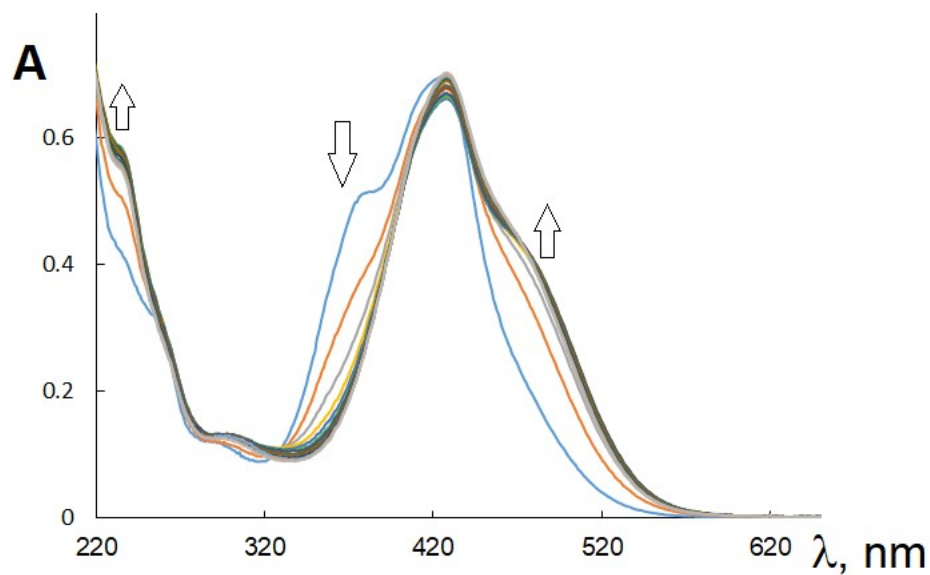

Fig 12S. Changes in electronic absorption spectra of ethanol solutions of  $H_3L^1$  at stepwise addition of the solution  $NiCl_2$

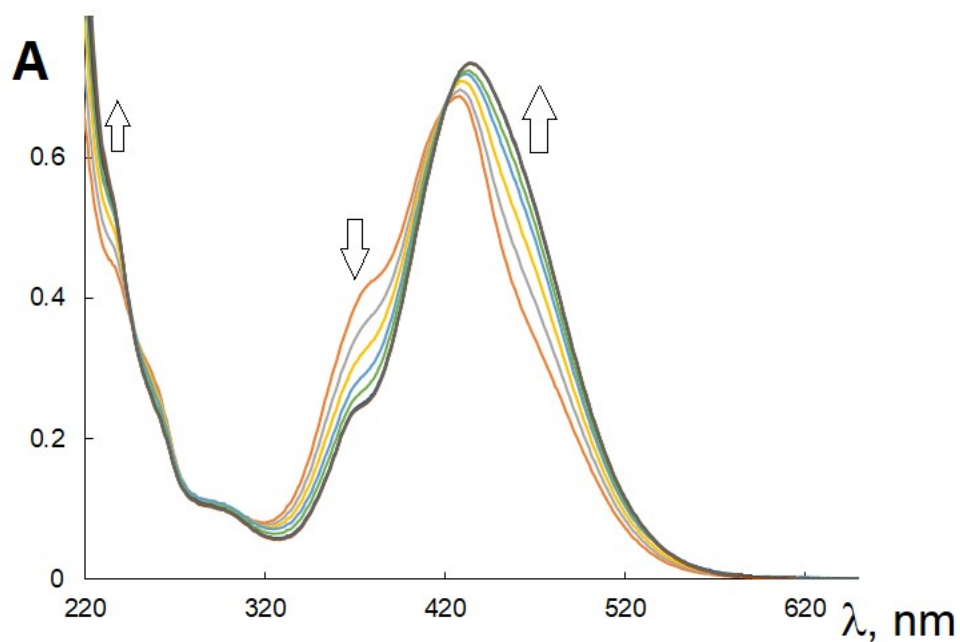

Fig 13S. Changes in electronic absorption spectra of ethanol solutions of  $H_3L^1$  at stepwise addition of the solution  $ZnCl_2$

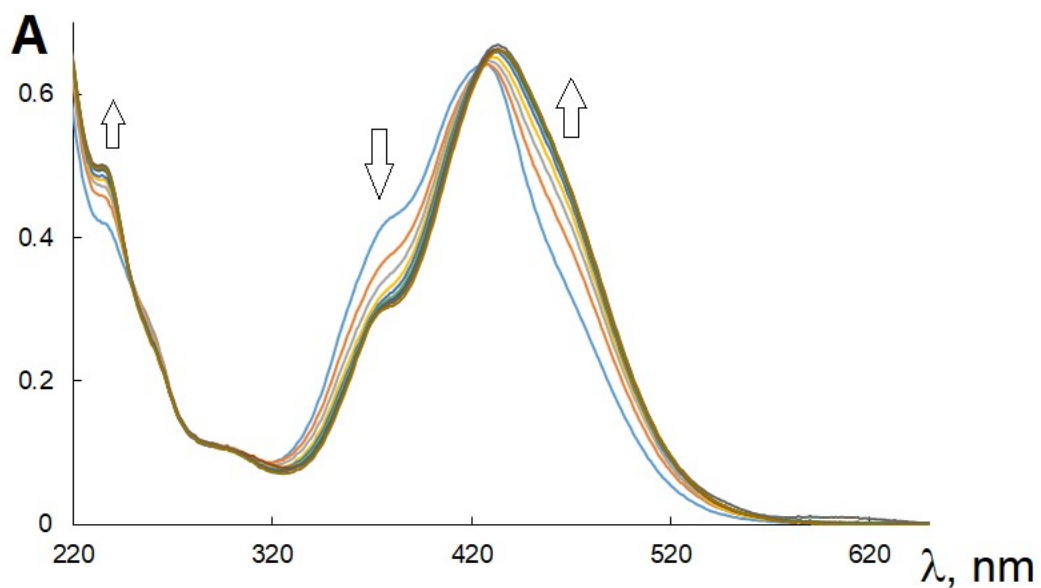

Fig 14S. Changes in electronic absorption spectra of ethanol solutions of  $H_3L^1$  at stepwise addition of the solution  $CdCl_2$

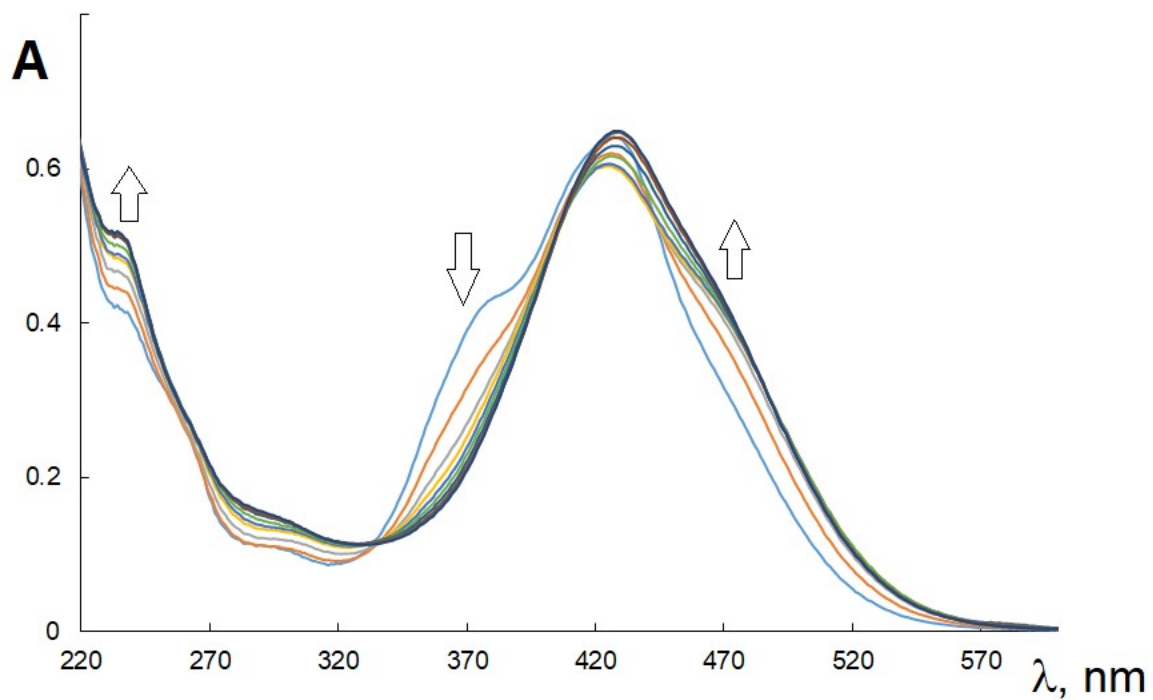

Fig 15S. Changes in electronic absorption spectra of ethanol solutions of  $H_3L^1$  at stepwise addition of the solution  $CoCl_2$

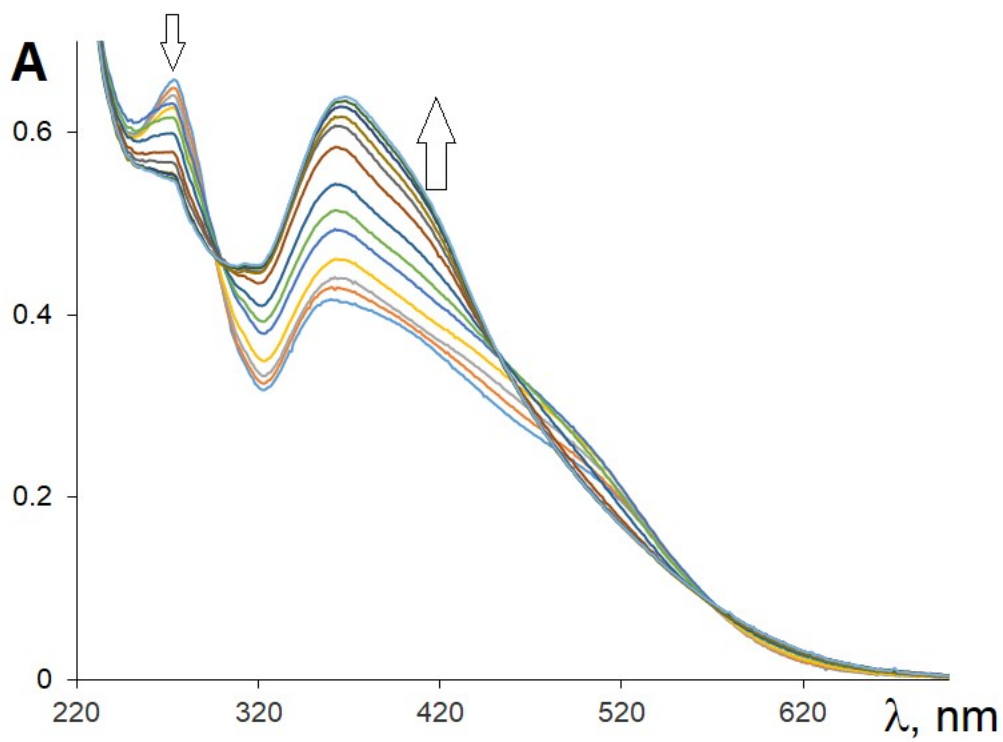

Fig 16S. Changes in electronic absorption spectra of ethanol solutions of  $H_3L^2$  at stepwise addition of the solution  $NiCl_2$

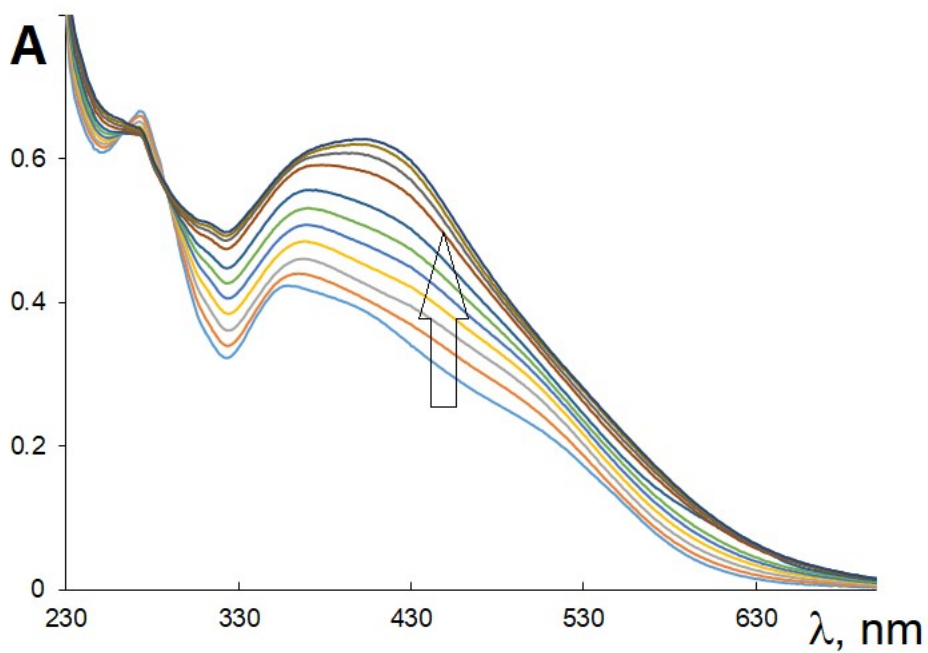

Fig 17S. Changes in electronic absorption spectra of ethanol solutions of  $H_3L^2$  at stepwise addition of the solution  $CoCl_2$

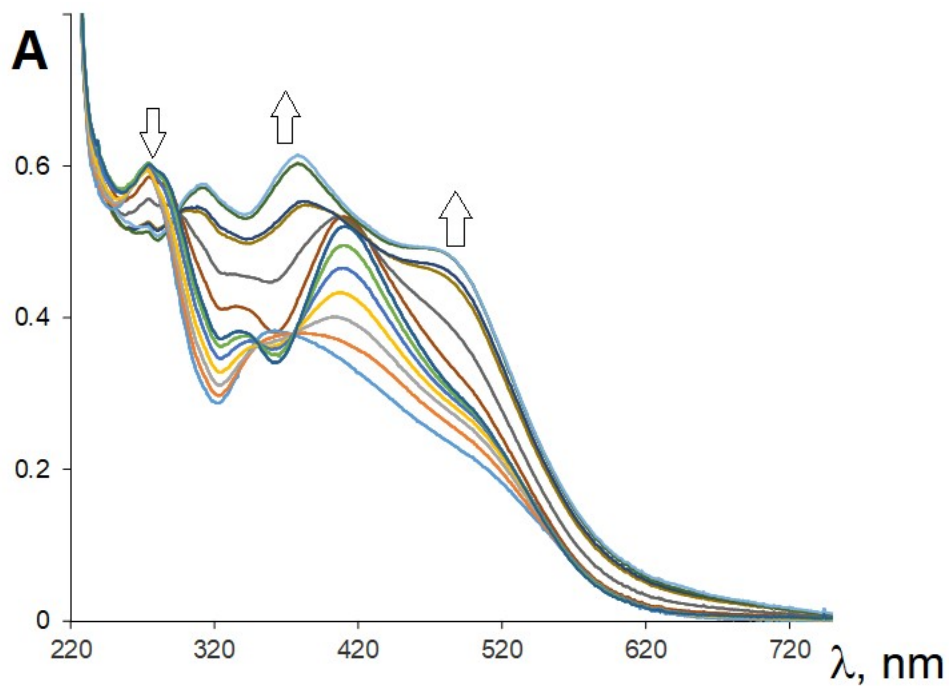

Fig 18S. Changes in electronic absorption spectra of ethanol solutions of  $H_3L^2$  at stepwise addition of the solution  $CuCl_2$

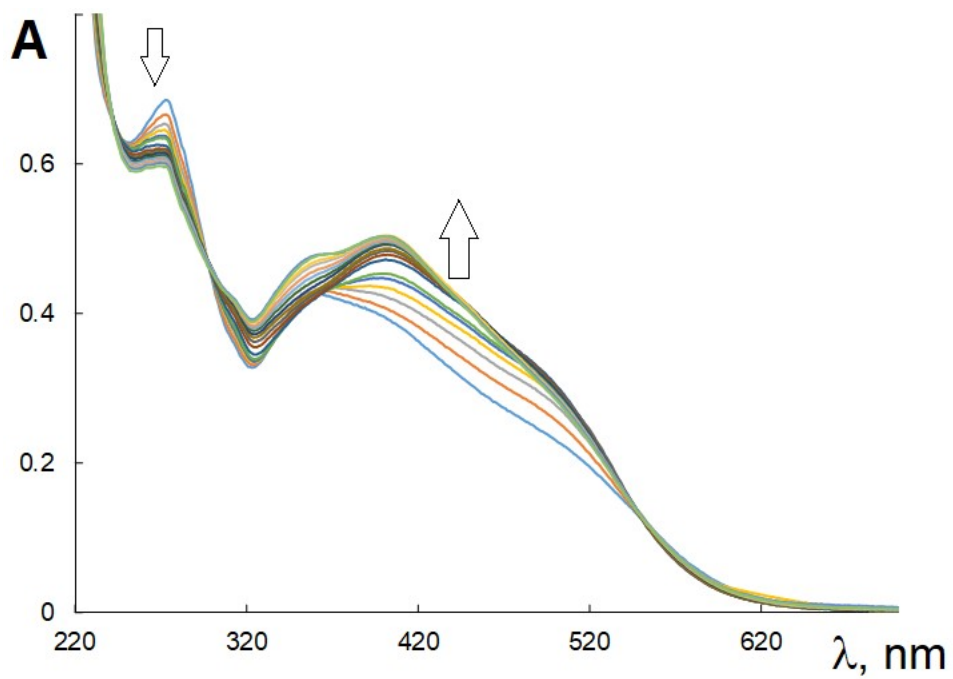

Fig 19S. Changes in electronic absorption spectra of ethanol solutions of  $H_3L^2$  at stepwise addition of the solution  $ZnCl_2$

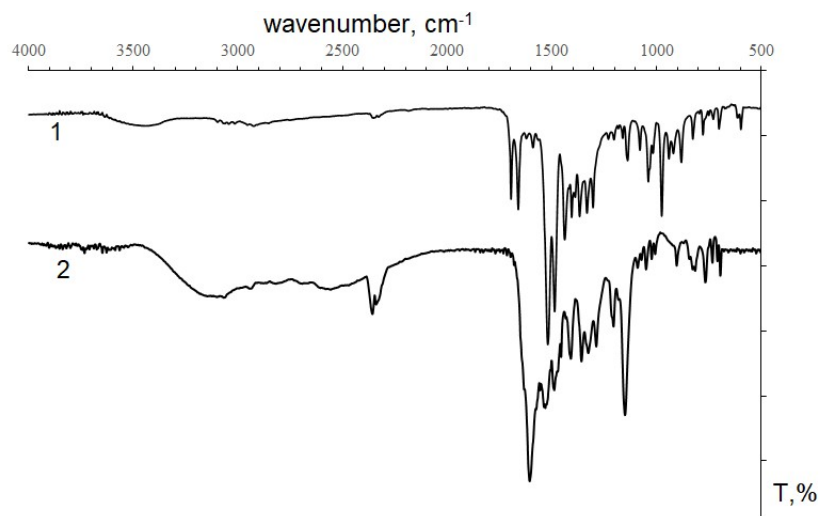

Fig 20S. IR spectra of  $H_3L^1(2)$  and  $H_3L^2(1)$

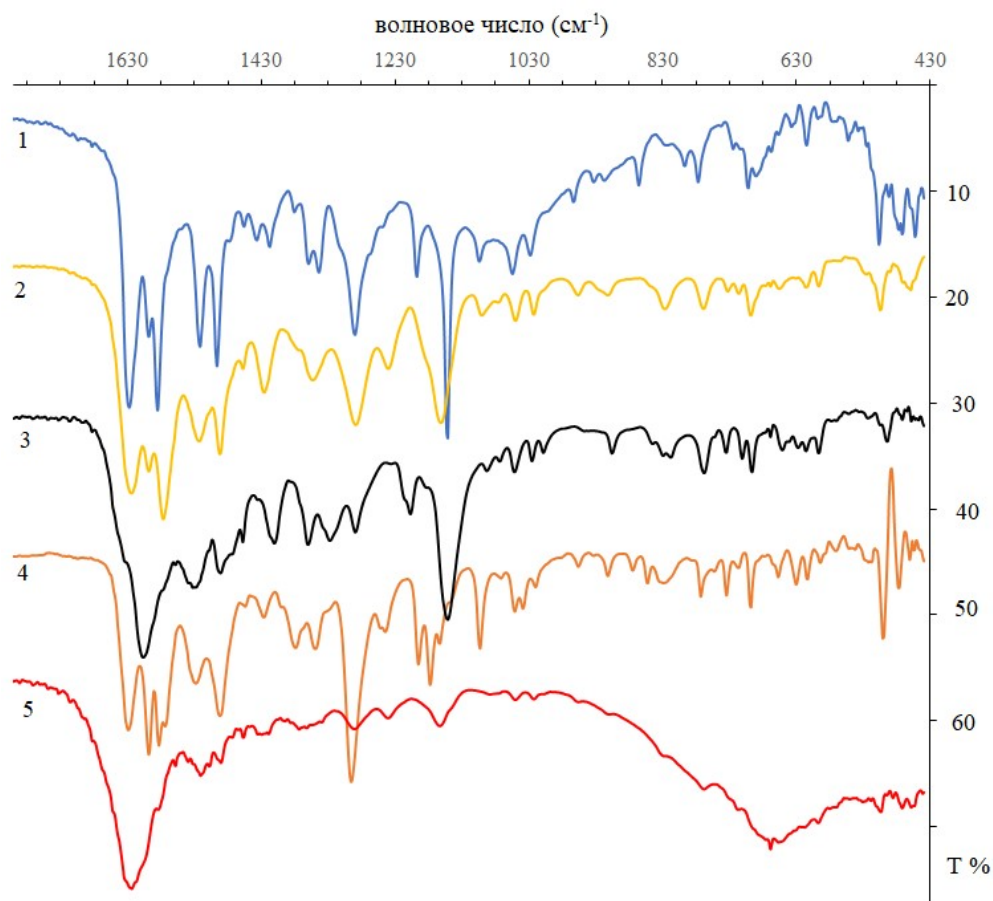

Fig 21S. IR spectra in the range 430 - 1800 cm<sup>-1</sup> of metal complexes: 1 -  $Cu(H_2L^1)Cl$  (3); 2 -  $Zn(H_2L^1)Cl \cdot 2H_2O$  (4); 3 -  $Cd_2Cl_4(H_3L^1)_2$  (5); 4 -  $Co(H_3L^1)Cl_2 \cdot 3H_2O$  (1);  $Ni(H_2L^1)Cl$  (2)

The determination of the dissociation constants of three ligands was archived by pH metric titration in aqueous solution. The ionic strength was controlled constant at 0.1 M by adding a calculated amount of KCl, and the Schwarzenbach algebraic method was used.

$$K_1 = \frac{[H^+]\{ac_{Ligan} + [H^+] - [OH^-]\}}{(1 - \alpha)c_{Ligan} - [H^+] + [OH^-]}; \quad K_2 = \frac{[H^+]\{(a - 1)c_{Ligan} + [H^+] - [OH^-]\}}{(2 - a)c_{Ligan} - [H^+] + [OH^-]},$$

$$K_3 = \frac{[H^+]\{(a - 2)c_{Ligan} + [H^+] - [OH^-]\}}{(3 - a)c_{Ligan} - [H^+] + [OH^-]}$$

where  $c_{Ligan}$  is the total concentration of  $H_3L^i$  ( $i=1,2$ ) and  $a$  is the neutralization point.

We titrated 25 mL  $4.22 \times 10^{-4}$  M solution of ligands ( $H_3L^1$  and  $H_3L^2$ ) with  $5.15 \times 10^{-3}$  M solution of NaOH (figure 20S).

**For example:** After addition of 0.35 mL  $5.15 \cdot 10^{-3}$  M solution of NaOH to 25 mL  $4.22 \cdot 10^{-4}$  M solution of  $H_3L^2$ , we observed that pH 4.04. So  $[H^+] = 9.12 \cdot 10^{-5}$ ;  $[OH^-] = 1.10 \cdot 10^{-10}$  M, and

neutralization point: 
$$a = \frac{0.35 \times 5.14 \times 10^{-3}}{25 \times 4.22 \times 10^{-4}} = 0.17$$

$K_1$

$$= \frac{[H^+]\{ac_{H_2L} + [H^+] - [OH^-]\}}{(1 - \alpha)c_{H_2L} - [H^+] + [OH^-]} = \frac{[9.12 \cdot 10^{-5}]\{0.17 \cdot 4.22 \cdot 10^{-4} + 9.12 \cdot 10^{-5}\}}{(1 - 0.17)4.22 \cdot 10^{-4} - 9.12 \cdot 10^{-5} + 1.10 \cdot 10^{-10}}$$

$$= 5.76 \cdot 10^{-5}$$

(See table 1)

**Table 1.** Calculation of the dissociation constants of  $H_3L^2$  at 298K.

| $V_{NaOH}$ , mL | $a$  | pH   | $[H^+]$ , M          | $[OH^-]$ , M          | $K_a$ , M            | pK   |
|-----------------|------|------|----------------------|-----------------------|----------------------|------|
| 0.35            | 0.17 | 4.04 | $9.12 \cdot 10^{-5}$ | $1.10 \cdot 10^{-10}$ | $5.76 \cdot 10^{-5}$ | 4.24 |
| 0.77            | 0.38 | 4.23 | $5.89 \cdot 10^{-5}$ | $1.69 \cdot 10^{-10}$ | $6.27 \cdot 10^{-5}$ | 4.20 |
| 1.01            | 0.49 | 4.37 | $4.27 \cdot 10^{-5}$ | $2.34 \cdot 10^{-10}$ | $6.25 \cdot 10^{-5}$ | 4.21 |

|                     |      |      |                       |                       |                       |      |
|---------------------|------|------|-----------------------|-----------------------|-----------------------|------|
| 1.53                | 0.75 | 4.77 | $1.69 \cdot 10^{-5}$  | $5.89 \cdot 10^{-10}$ | $6.29 \cdot 10^{-5}$  | 4.21 |
| 1.82                | 0.89 | 5.19 | $6.46 \cdot 10^{-6}$  | $1.55 \cdot 10^{-10}$ | $6.10 \cdot 10^{-5}$  | 4.21 |
| $pK_1=4.21\pm 0.03$ |      |      |                       |                       |                       |      |
| 2.38                | 1.16 | 5.85 | $1.41 \cdot 10^{-6}$  | $7.08 \cdot 10^{-9}$  | $2.81 \cdot 10^{-7}$  | 6.55 |
| 2.62                | 1.28 | 6.15 | $7.08 \cdot 10^{-7}$  | $1.41 \cdot 10^{-8}$  | $2.77 \cdot 10^{-7}$  | 6.56 |
| 3.01                | 1.47 | 6.53 | $2.95 \cdot 10^{-7}$  | $3.39 \cdot 10^{-8}$  | $2.63 \cdot 10^{-7}$  | 6.58 |
| 3.65                | 1.78 | 7.10 | $7.94 \cdot 10^{-8}$  | $1.26 \cdot 10^{-7}$  | $2.86 \cdot 10^{-7}$  | 6.54 |
| 3.80                | 1.85 | 7.25 | $5.62 \cdot 10^{-8}$  | $1.78 \cdot 10^{-7}$  | $3.33 \cdot 10^{-7}$  | 6.48 |
| $pK_2=6.54\pm 0.06$ |      |      |                       |                       |                       |      |
| 5.02                | 2.45 | 9.13 | $7.41 \cdot 10^{-10}$ | $1.73 \cdot 10^{-5}$  | $5.37 \cdot 10^{-10}$ | 9.27 |
| 5.26                | 2.67 | 9.49 | $3.23 \cdot 10^{-10}$ | $3.09 \cdot 10^{-5}$  | $3.18 \cdot 10^{-10}$ | 9.49 |
| 5.50                | 2.69 | 9.76 | $1.73 \cdot 10^{-10}$ | $5.75 \cdot 10^{-5}$  | $2.13 \cdot 10^{-10}$ | 9.66 |
| 5.78                | 2.82 | 9.97 | $1.07 \cdot 10^{-10}$ | $9.33 \cdot 10^{-5}$  | $1.62 \cdot 10^{-10}$ | 9.79 |
| $pK_2=9.55\pm 0.28$ |      |      |                       |                       |                       |      |





Fig 21S. Coloristic test of  $H_3L^1$ ,  $H_3L^2$  and their complexes
